# Supplementary material for: Real-Time Observation of the Interaction between Thioflavin T and an Amyloid Protein by Using High-Sensitivity Rheo-NMR
Source: MDPI journal article supplement (doi:10.3390/ijms18112271), 2017-10-28
Supplement: s1 [file s1]

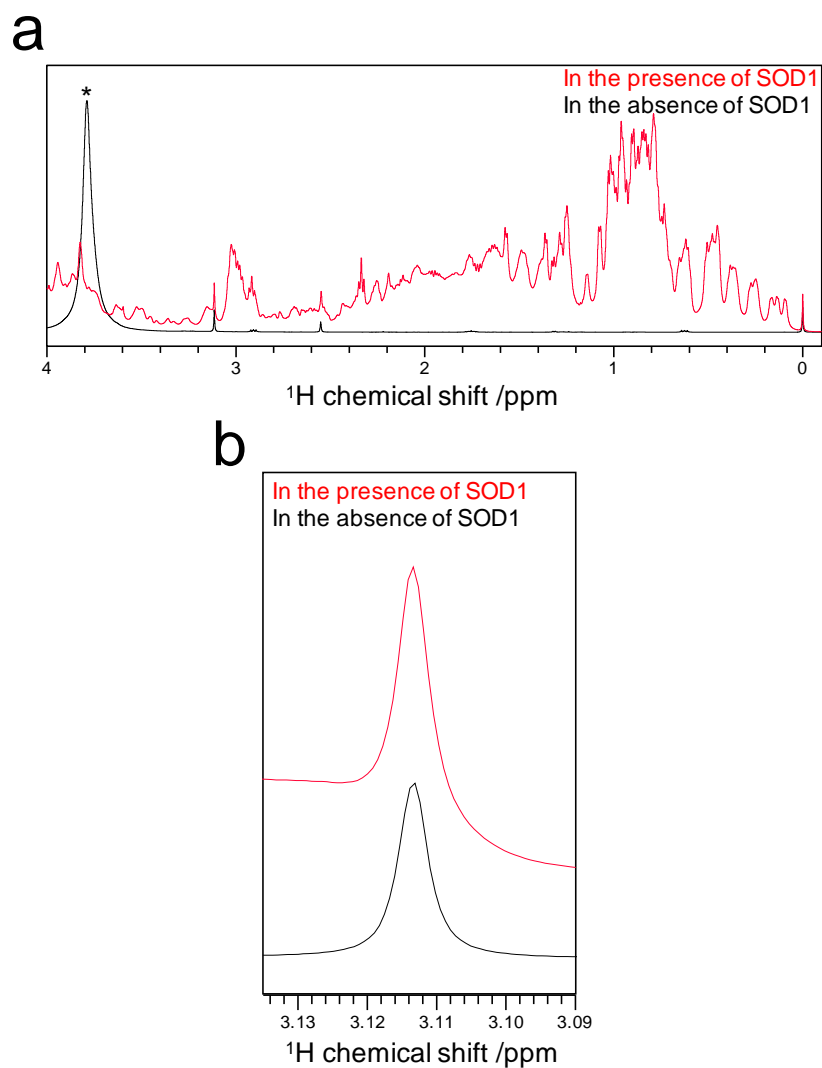

**Figure S1.** Comparison between the peaks of ThT in the absence and presence of monomeric SOD1: (a)  $^1\text{H}$  NMR spectra of ThT in the range of -0.1 ppm to 4 ppm in the absence (black) and presence (red) of monomeric SOD1. The peak indicated by an asterisk in the spectrum is derived from Bis-Tris because the sample was dissolved in undeuterated Bis-Tris buffer for the NMR measurement of ThT without SOD1; (b) An enlarged view of the DMA peak in the absence (black) and presence (red) of monomeric SOD1.

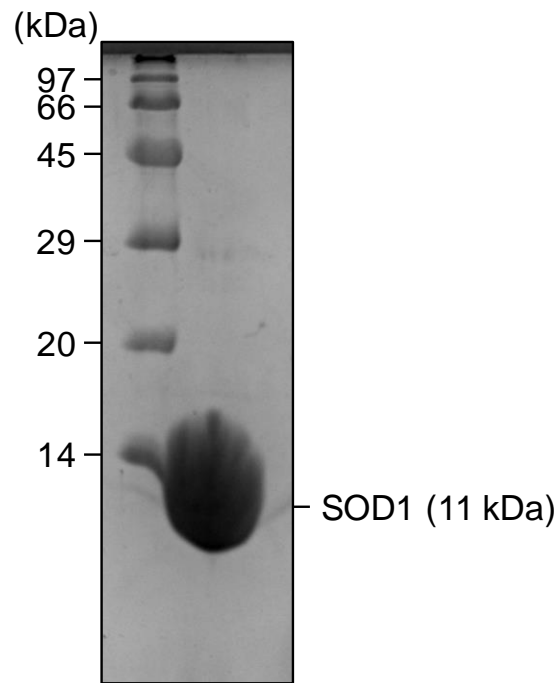

**Figure S2.** SDS-PAGE analysis of purified SOD1: Left lane, molecular weight marker; Right lane, SOD1 after purification by size-exclusion chromatography.
